# Supplementary material for: The Pharmaco –, Population and Evolutionary Dynamics of Multi-drug Therapy: Experiments with S. aureus and E. coli and Computer Simulations
Source: PLoS Pathog. 2013 Apr 4;9(4):e1003300. doi: 10.1371/journal.ppat.1003300 (PMC3617031; doi:10.1371/journal.ppat.1003300)
Supplement: Text S1 — Differential equations used for simulation of the two-compartment mathematical model. (DOCX) [file ppat.1003300.s008.docx]

Text S1. Differential equations used for simulation of the two-compartment mathematical model.

Growth Rates:

Mutation Rates:

Resources:

Antibiotics:
